# Supplementary material for: In vivo stepwise immunomodulation using chitosan nanoparticles as a platform nanotechnology for cancer immunotherapy
Source: PubMed Central journal article supplement (PMC5133713; doi:10.1038/srep38348), 2016-12-02
Supplement: srep38348-s1.pdf [file srep38348-s1.pdf]

## Supplementary Information

### ***In vivo* stepwise immunomodulation using chitosan nanoparticles as a platform nanotechnology for cancer immunotherapy**

Hee Dong Han, Yeongseon Byeon, Jong-Hwa Jang, Hat Nim Jeon, Ga Hee Kim, Min Gi Kim, Chan-Gi Pack, Tae Heung Kang, In Duk Jung, Yong Taik Lim, Young Joo Lee, Jeong-Won Lee, Byung Cheol Shin, Hyung Jun Ahn, Anil K. Sood, and Yeong-Min Park

#### Corresponding authors:

Hee Dong Han, Department of Immunology, School of Medicine, Konkuk University, Chungju 380-701, South Korea, Phone: 82-2-2049-6273, Fax: 82-2-2049-6192, E-mail: [hanhd@kku.ac.kr](mailto:hanhd@kku.ac.kr)

Yeong Min Park, Department of Immunology, School of Medicine, Konkuk University, Chungju 380-701, South Korea, Phone: 82-2-2049-6273, Fax: 82-2-2049-6192, E-mail: [immun3023@kku.ac.kr](mailto:immun3023@kku.ac.kr)

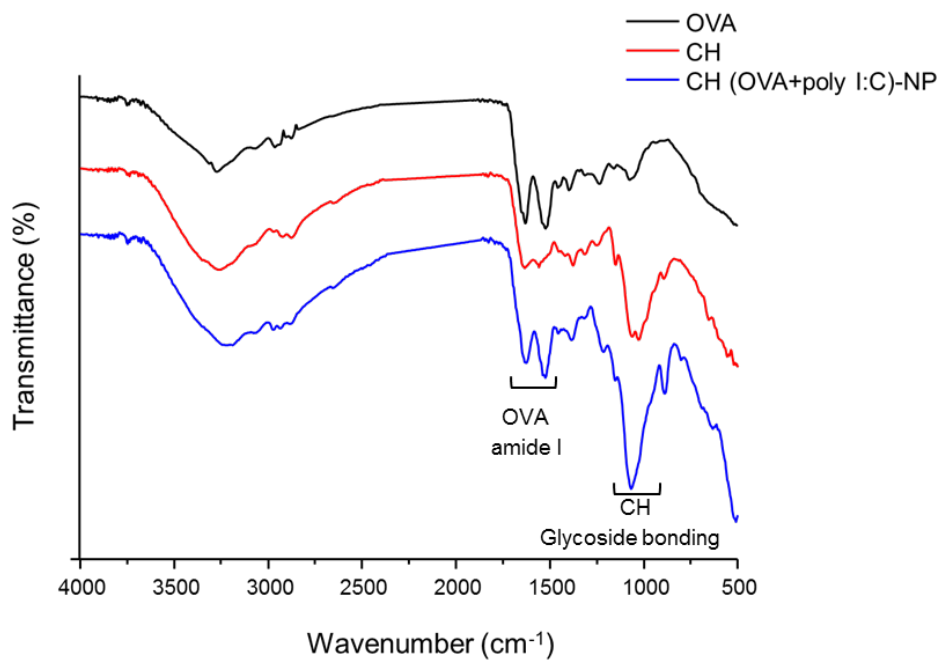

**Figure S1.** FT-IR spectra of CH-NP. The complex of CH (OVA+poly I:C)-NP was confirmed by CH peak (glycoside group: 1151 cm<sup>-1</sup> and 888 cm<sup>-1</sup>) of chitosan (CH) and amide I peak (carboxyl C=O stretch, 1520-1623 cm<sup>-1</sup>) of OVA.

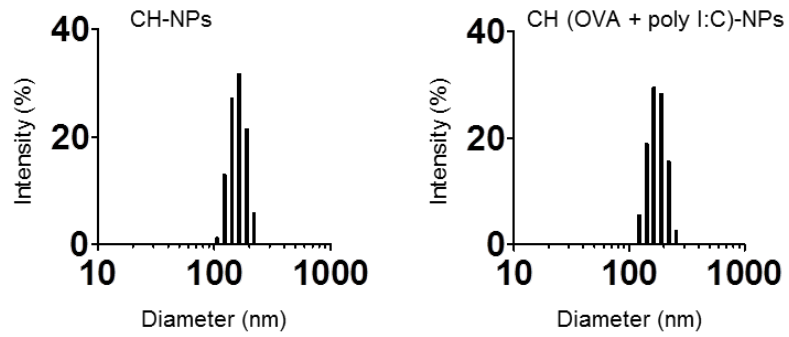

|                      | Polydispersity index (PDI) |
|----------------------|----------------------------|
| CH-NP                | 0.258                      |
| CH (OVA+poly I:C)-NP | 0.233                      |

**Figure S2.** Representative histograms of size distributions for CH-NPs and CH (OVA+poly I:C)-NPs.

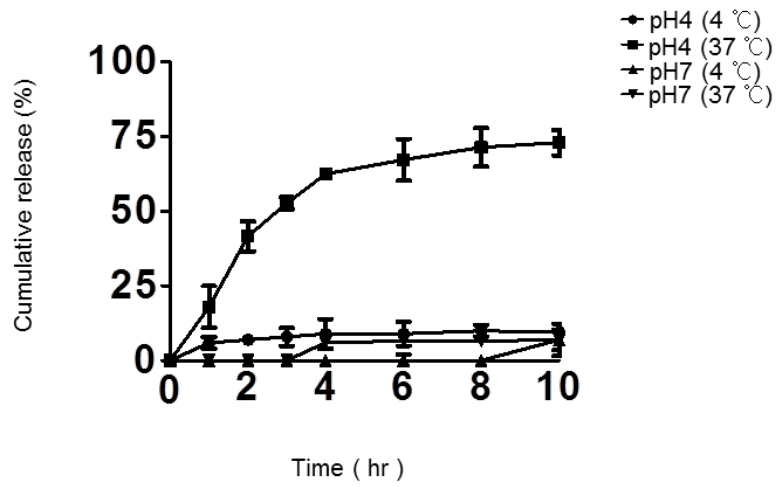

**Figure S3.** Release of OVA from CH (OVA+poly I:C)-NPs at 4°C or 37°C under acidic conditions that mimic the intracellular conditions. The data are represented as a mean  $\pm$  S.D. (n=3).

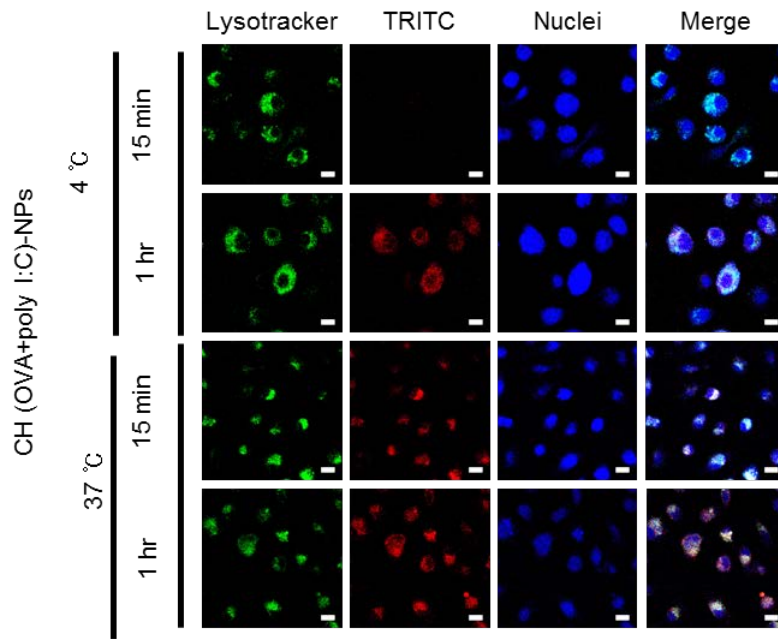

**Figure S4.** A photograph of Intracellular delivery of CH (OVA+poly I:C)-NPs into DCs at different temperature. Red: TRITC-labeled OVA. Blue: nuclei. Scale bar: 10  $\mu$ m.

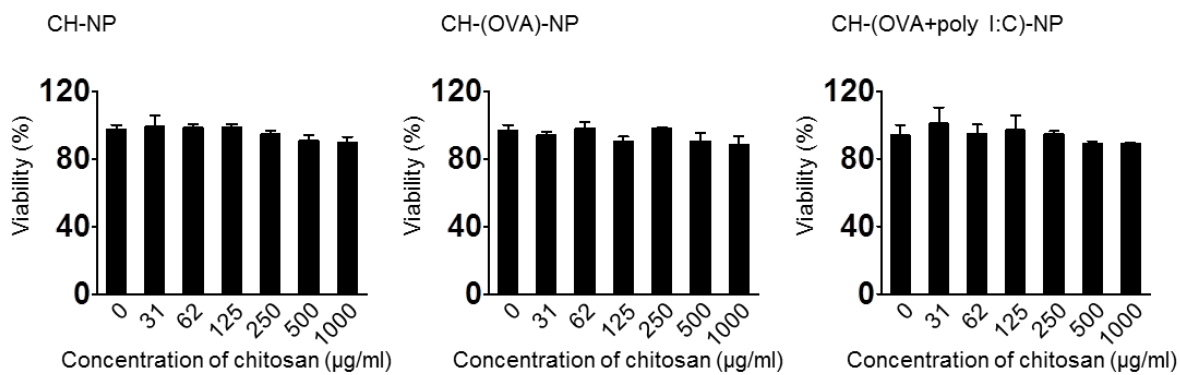

**Figure S5.** Cell viability following treatment with increasing concentration of chitosan for 24 h incubation. The data are represented as a mean  $\pm$  S.D. (n=3).

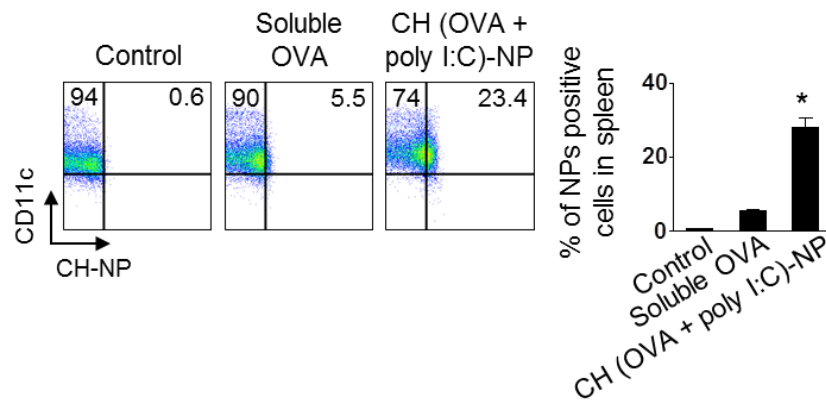

**Figure S6.** Migration of DCs containing CH (OVA+poly I:C)-NPs to the spleen. Mouse splenocytes were collected and analyzed by flow cytometry for the DCs (stained with anti-CD11c antibody) and CH (OVA+poly I:C)-NPs labeled with TRITC (\*p < 0.001). Error bars represent s.e.m

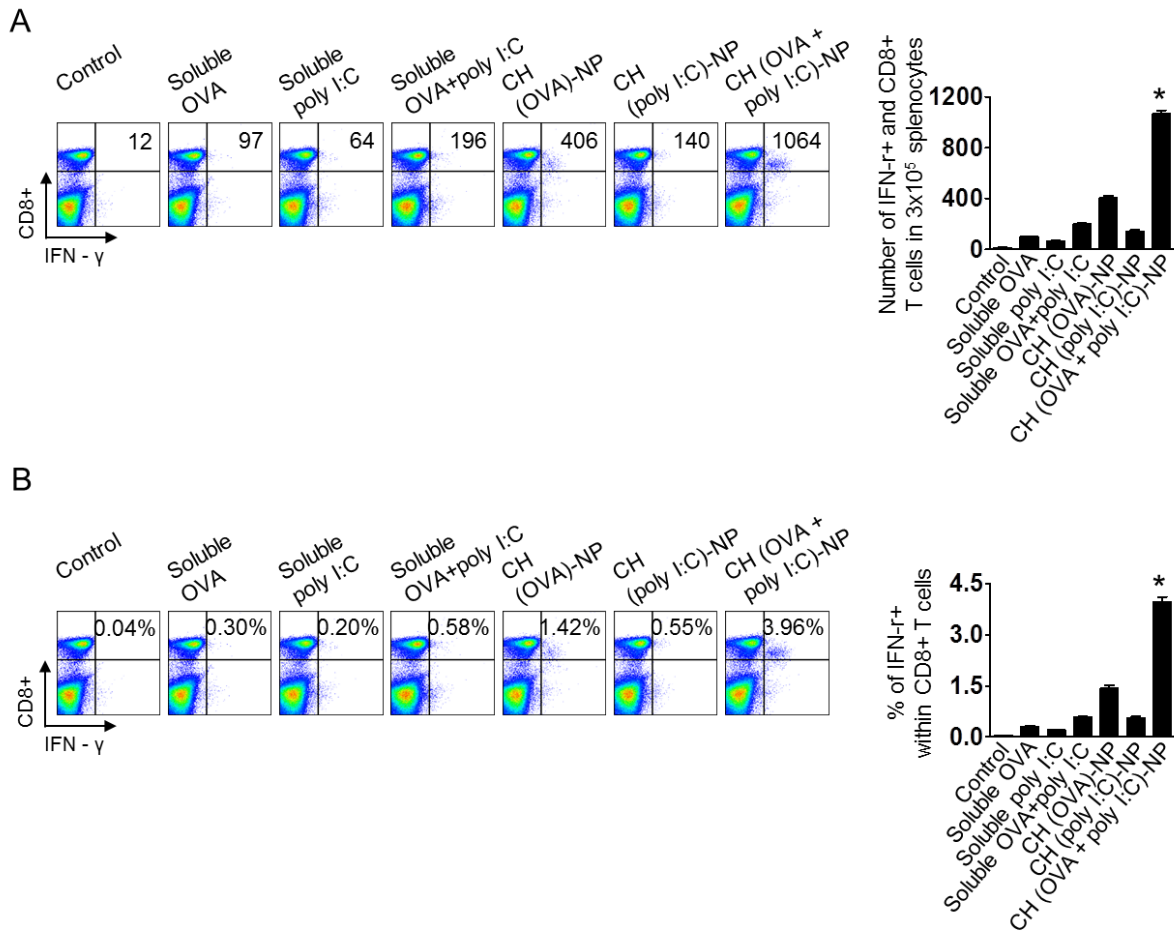

**Figure S7.** Cytotoxic CD8+ T cell activation was assessed in the splenocytes of the immunized mice by flow cytometric analysis for cells positively stained with anti-CD8 and anti-IFN- $\gamma$  antibodies. Mice were injected PBS (i.p.) as a control, soluble OVA, soluble poly I:C, soluble OVA+poly I:C, CH (OVA)-NPs, CH (poly I:C)-NPs, or CH (OVA + poly I:C)-NPs via the s.c. route into mice (n = 5 mice per group). **(A)** Number of IFN- $\gamma$ + and CD8+ T cells in splenocytes. **(B)** % of IFN- $\gamma$ + within CD8+ T cells. The bar graph depicts the number of CD8+ T cells (\*p < 0.001). Error bars represent s.e.m.



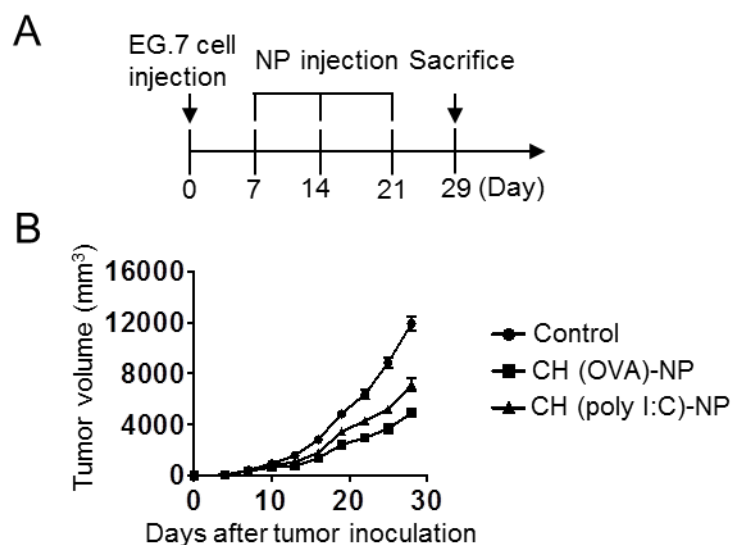

**Figure S8.** Antitumor efficacy of CH (OVA)-NP or CH (poly I:C)-NP treatment in the EG.7 tumor model. Treatment began 1 week after s.c. injection of tumor cells into the mice. Control, CH (OVA)-NP, or CH (poly I:C)-NP were injected three times at weekly intervals at a dose of 100  $\mu$ g of OVA and 80  $\mu$ g of poly I:C via i.p. injection. **(A)** The schedule of the CH-NP-based antitumor treatment. **(B)** Tumor volume after treatment with the various formulations. Error bars represent s.e.m.

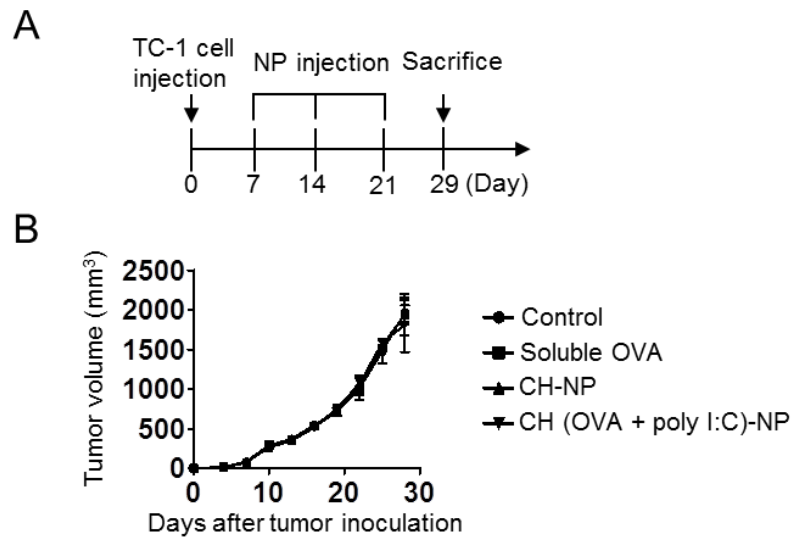

**Figure S9.** Antitumor efficacy of CH (OVA+poly I:C)-NP treatment in the TC-1 tumor model (OVA-negative tumor) as an irrelevant antigen model. Treatment began 1 week after s.c. injection of tumor cells into the mice. Control, soluble OVA, CH-NPs, or CH (OVA+poly I:C)-NPs were injected three times at weekly intervals at a dose of 100  $\mu$ g of OVA and 80  $\mu$ g of poly I:C via i.p. injection. **(A)** The schedule of the CH (OVA+poly I:C)-NP-based antitumor treatment. **(B)** Tumor volume after treatment with the various formulations. Error bars represent s.e.m.

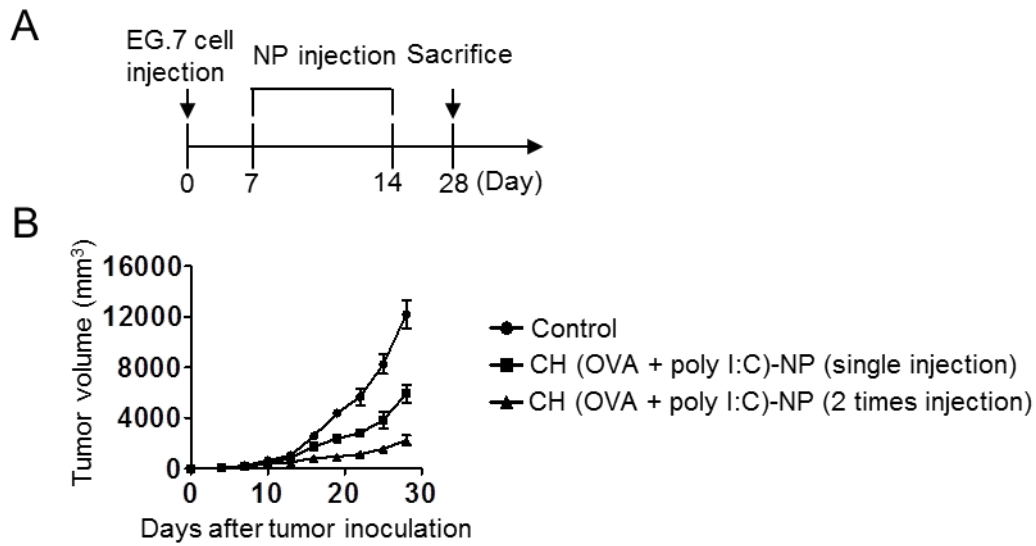

**Figure S10.** Antitumor efficacy of CH (OVA+poly I:C)-NPs at a different number of injection time points in the EG.7 tumor model. **(A)** The schedule of the CH (OVA+poly I:C)-NP-based antitumor treatment. **(B)** Tumor volume. Error bars represent s.e.m.

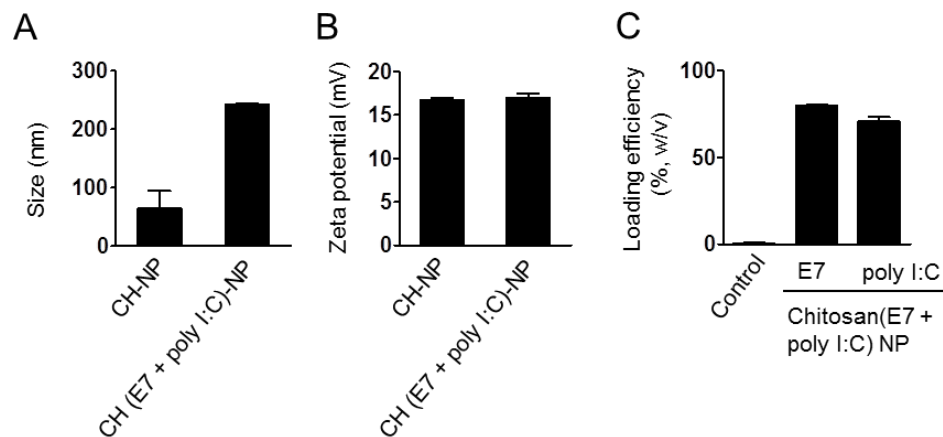

**Figure S11.** Physical properties of CH (E7+poly I:C)-NPs. **(A)** Size and **(B)** zeta potential of the CH-NPs and CH (E7+poly I:C)-NPs. **(C)** Individual loading efficiency of E7 and poly I:C into CH (E7+poly I:C)-NPs. The data are represented as a mean  $\pm$  S.D. (n=3).
